# Supplementary material for: Diel-Regulated Transcriptional Cascades of Microbial Eukaryotes in the North Pacific Subtropical Gyre
Source: Front Microbiol. 2021 Sep 29;12:682651. doi: 10.3389/fmicb.2021.682651 (PMC8511712; doi:10.3389/fmicb.2021.682651)
Supplement: Supplementary file 13 [file Data_Sheet_3.CSV]

tax_name	tax_id	n_knums	n_core	fract_core	hi_group	diel_knum	pct_diel_knum	read_totals
Tetraselmis	3164	935	120	0.379746835	Chlorophyte	31	0.03315508	128297
Acanthoeca	81532	2454	173	0.547468354	Opisthokont	387	0.157701711	19453992
Strombidium	60005	1659	258	0.816455696	Ciliate	324	0.195298373	13960968
Stephanopyxis	3006	1282	203	0.642405063	Ochrophyte	57	0.044461778	11349251
Chaetoceros	49237	1271	156	0.493670886	Ochrophyte	60	0.047206924	184933
Florenciella	236786	2416	220	0.696202532	Ochrophyte	352	0.145695364	9037937
Dictyocha	35686	2509	282	0.892405063	Ochrophyte	539	0.214826624	6399092
Rhizochromulina	35673	1805	228	0.721518987	Ochrophyte	215	0.119113573	2772268
Oxyrrhis	2968	1919	156	0.493670886	Dinoflagellate	71	0.036998437	17268193
Kryptoperidinium	160618	1022	102	0.32278481	Dinoflagellate	21	0.020547945	7040116
Karenia <Dinophyceae>	156229	4842	273	0.863924051	Dinoflagellate	172	0.035522511	55492730
Amphidinium	2960	1059	98	0.310126582	Dinoflagellate	13	0.012275732	1158961
Amoebophrya	88551	1091	128	0.405063291	Dinoflagellate	82	0.075160403	4292888
Polarella	89956	992	92	0.291139241	Dinoflagellate	23	0.023185484	3218153
Prorocentrum	2944	3992	282	0.892405063	Dinoflagellate	84	0.021042084	23408382
Lingulodinium	160620	1594	104	0.329113924	Dinoflagellate	30	0.018820577	8325754
Alexandrium	2924	3582	262	0.829113924	Dinoflagellate	208	0.058068118	681217
Dinophysis	47933	1712	148	0.46835443	Dinoflagellate	37	0.02161215	11678820
Symbiodinium	2949	2590	199	0.629746835	Dinoflagellate	75	0.028957529	972680
Pyrodinium	73914	1474	102	0.32278481	Dinoflagellate	37	0.025101764	9418213
Karlodinium	157684	5034	294	0.930379747	Dinoflagellate	291	0.057806913	66618473
Noctiluca	2965	1658	134	0.424050633	Dinoflagellate	54	0.032569361	10843099
Protoceratium	133426	965	83	0.262658228	Dinoflagellate	17	0.01761658	3887510
Togula	285028	1101	96	0.303797468	Dinoflagellate	25	0.02270663	6322940
Azadinium	632149	3534	205	0.648734177	Dinoflagellate	57	0.016129032	11279533
Scrippsiella	54902	3823	246	0.778481013	Dinoflagellate	125	0.032696835	15281845
Heterocapsa	2918	914	82	0.259493671	Dinoflagellate	24	0.026258206	6381462
Pelagodinium	766107	3034	221	0.699367089	Dinoflagellate	99	0.032630191	15609780
Tripos	2126447	2344	173	0.547468354	Dinoflagellate	76	0.032423208	21958993
Brandtodinium	1482939	1335	134	0.424050633	Dinoflagellate	32	0.023970037	5632521
Gymnodinium	2955	3584	221	0.699367089	Dinoflagellate	71	0.019810268	21630621
Prymnesium	35143	4019	255	0.806962025	Haptophyte	711	0.176909679	17889029
Haptolina	1090112	3386	258	0.816455696	Haptophyte	753	0.222386297	4669686
Phaeocystis	33656	3152	262	0.829113924	Haptophyte	1079	0.342322335	1258366
Scyphosphaera	2134067	1431	121	0.382911392	Haptophyte	174	0.121593291	4688359
Imantonia	97494	1214	195	0.617088608	Haptophyte	208	0.171334432	4185990
Chrysochromulina	35140	2655	204	0.64556962	Haptophyte	595	0.224105461	15135729
Capitella	51293	1832	101	0.319620253	Opisthokont	36	0.019650655	903999
Orcinus	9732	1148	57	0.180379747	Opisthokont	26	0.022648084	360180
Octopus	6643	1236	62	0.196202532	Opisthokont	26	0.021035599	740706
Salmo	8028	1650	75	0.237341772	Opisthokont	65	0.039393939	809471
Lepeophtheirus	72035	4233	233	0.737341772	Opisthokont	987	0.233167966	22919638
Nematostella	45350	1742	88	0.278481013	Opisthokont	23	0.013203215	1049069
Oikopleura	34763	4476	276	0.873417722	Opisthokont	336	0.075067024	10685579
Paraphysomonas	36769	977	79	0.25	Ochrophyte	177	0.181166837	28962
Neobodo	312470	932	136	0.430379747	Other	17	0.018240343	621357
Pelagococcus	35678	1236	180	0.569620253	Ochrophyte	217	0.175566343	2457448
Phytophthora	4783	1059	107	0.338607595	Other	34	0.03210576	3874855
